# Supplementary material for: Polymer solar cells based on diphenylmethanofullerenes with reduced sidechain length
Source: Royal Society of Chemistry journal article supplement (doi:10.1039/c0jm01160f), 2010-08-17
Supplement: c0jm01160f.pdf [file c0jm01160f.pdf]

## Supplementary Information

# Polymer solar cells based on diphenylmethanofullerenes with reduced sidechain length

Henk J. Bolink,<sup>a,d\*</sup> Eugenio Coronado,<sup>a</sup> Alicia Forment-Aliaga,<sup>a</sup> Martijn Lenes,<sup>a\*</sup> Andrea La Rosa,<sup>b</sup> Salvatore Filippone,<sup>b</sup> and Nazario Martín<sup>b,c\*</sup>

<sup>a</sup> Instituto de Ciencia Molecular, Universidad de Valencia, PO Box 22085, ES-46071 Valencia, Spain. E-mail: [henk.bolink@uv.es](mailto:henk.bolink@uv.es)

<sup>b</sup> Departamento de Química Orgánica, Facultad de Química, Universidad Complutense, 28040 Madrid, Spain E-mail: [nazmar@quim.ucm.es](mailto:nazmar@quim.ucm.es)

<sup>c</sup> IMDEA-Nanociencia, 28049 Madrid, Spain

<sup>d</sup> Fundación General de la Universidad de Valencia

## Supplementary Information

The reaction has been performed using the procedure described elsewhere.<sup>1</sup>

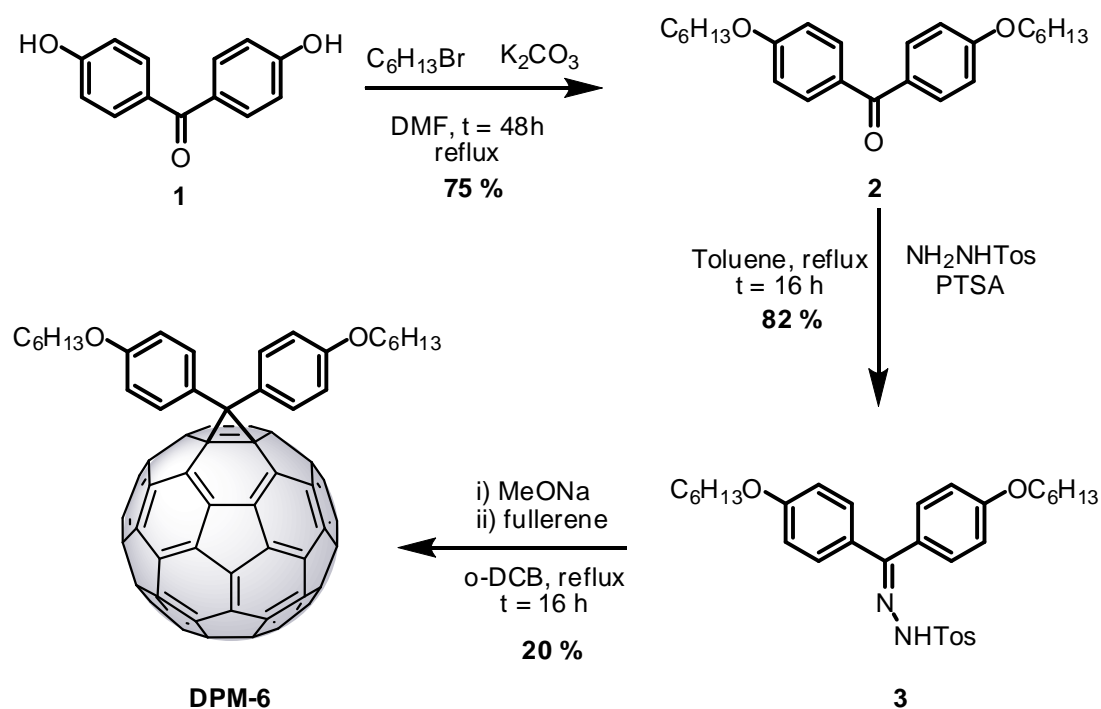

Scheme S1. Reagents and conditions used for the preparation of DPM-6.

<sup>1</sup> M.P. Hernández, F. Monroy, F. Ortega, R. G. Rubio, Á. Martín-Domenech E. M<sup>a</sup> Priego, L. Sánchez, N. Martín, *Langmuir*, **2001**, 17, 3317-3328

## 4,4'-bis(hexyloxyphenyl)benzophenone (2)

$^1\text{H-NMR}$  ( $\text{CDCl}_3$ , 300 MHz, 25° C):  $\delta$  = 7.78 (d,  $J$  = 8.43 Hz, 4H), 6.96 (t,  $J$  = 8.43 Hz, 4H), 4.04 (t,  $J$  = 6.51 Hz, 4H), 1.82 (m, 4H), 1.51 (m, 4H), 1.36 (m, 8H), 0.92 (t,  $J$  = 6.90 Hz, 6H).

$^{13}\text{C-NMR}$  ( $\text{CDCl}_3$ , 75 MHz, 25° C):  $\delta$  = 162.47, 132.22, 130.63, 113.94, 68.28, 31.57, 29.13, 25.70, 22.60, 14.02 ppm.

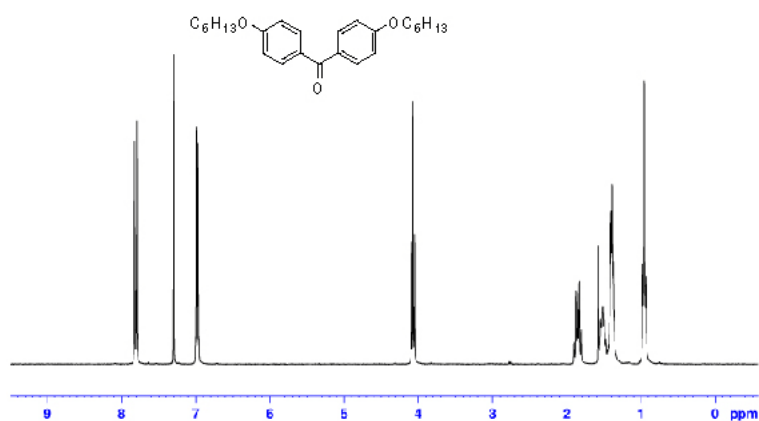

Figure S1.  $^1\text{H-NMR}$  of 4,4'-bis(hexyloxyphenyl)benzophenone

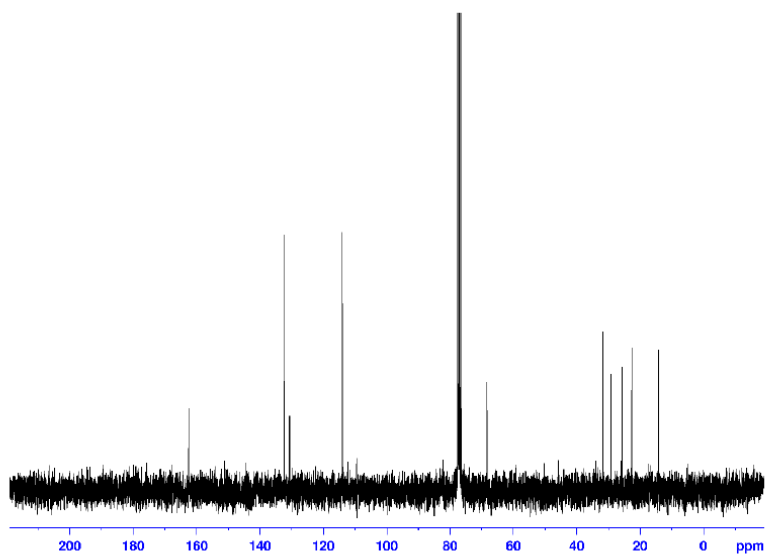

**Figure S2.**  $^{13}\text{C}$ -NMR of 4,4'-bis(hexyloxyphenyl)benzophenone

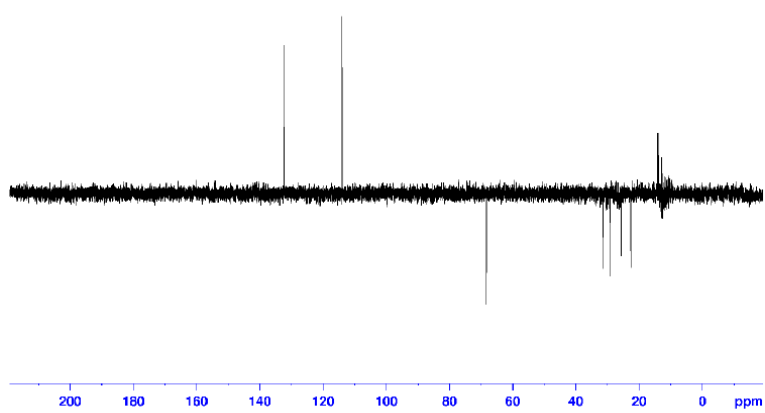

**Figure S3.** DEPT of 4,4'-bis(hexyloxyphenyl)benzophenone

## Dihexyloxybenzophenone-4-methylbenzenesulfonylhydrazone

$^1\text{H}$ -NMR ( $\text{CDCl}_3$ , 300 MHz, 25° C):  $\delta$  = 7.85 (d,  $J$  = 8.33 Hz, 2H), 7.78 (d,  $J$  = 8.81 Hz, 2H), 7.37 (d,  $J$  = 8.95 Hz, 2H), 7.32 (d,  $J$  = 8.06 Hz, 2H), 6.95 (d,  $J$  = 8.81 Hz, 4H), 6.79 (d,  $J$  = 8.96 Hz, 2H), 3.99 (dt, 4H), 1.87 (m, 4H), 1.49 (m, 4H), 1.36 (m, 8H), 0.92 (t,  $J$  = 6.83 Hz, 6H).

$^{13}\text{C}$ -NMR ( $\text{CDCl}_3$ , 75 MHz, 25° C):  $\delta$  = 194.49, 162.48, 154.55, 143.93, 135.74, 132.22, 129.90, 129.59, 129.25, 127.94, 115.53, 114.08, 113.94, 68.25, 31.57, 29.15, 25.73, 25.70, 22.62, 22.60, 21.62, 14.03 ppm.

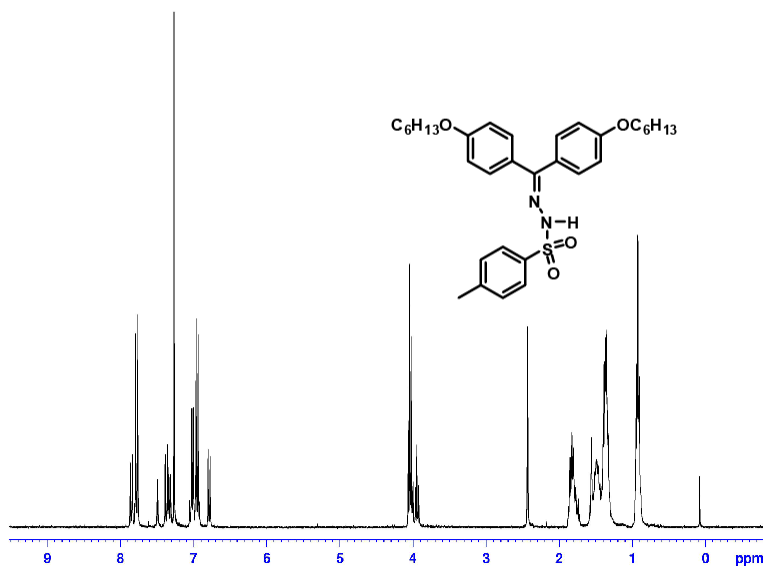

Figure S4.  $^1\text{H}$ -NMR of Dihexyloxybenzophenone-4-methylbenzenesulfonylhydrazone

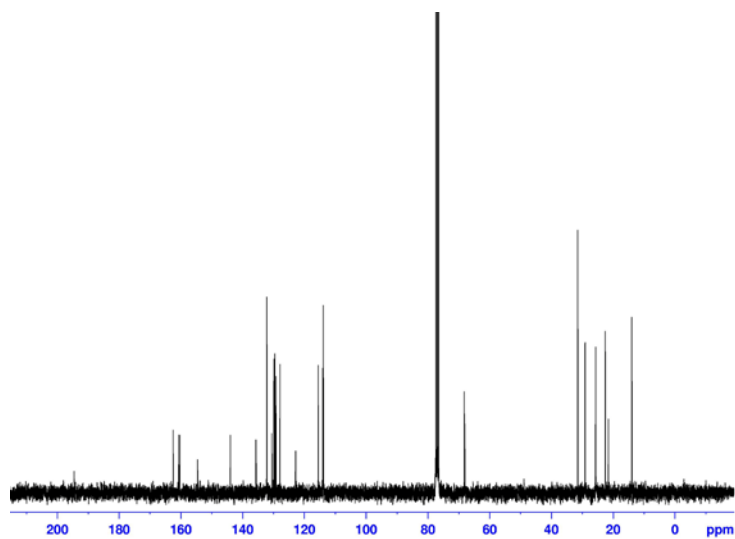

Figure S5.  $^{13}\text{C}$ -NMR of Dihexyloxybenzophenone-4-methylbenzenesulfonylhydrazone

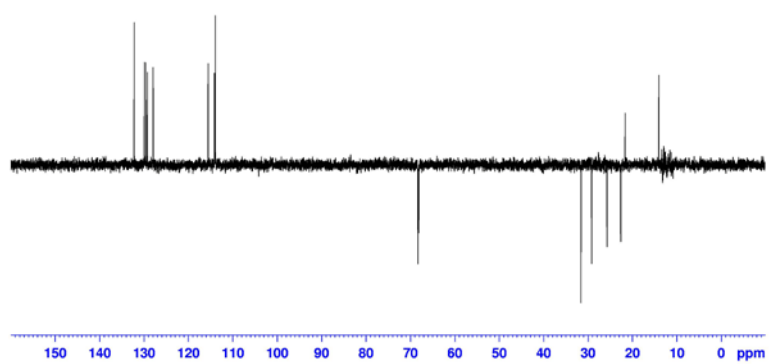

**Figure S6.** DEPT of Dihexyloxybenzophenone-4-methylbenzenesulfonylhydrazone

### 4,4'-dihexyloxydiphenylmethano[60]fullerene (DPM-6)

$^1\text{H}$ -NMR ( $\text{CDCl}_3$ , 300 MHz, 25° C):  $\delta$  = 7.98 (d,  $J$  = 8.79 Hz, **4H**), 6.99 (d,  $J$  = 8.79 Hz, **4H**), 3.99 (t,  $J$  = 6.38 Hz, **4H**), 1.80 (m, **4H**), 1.48 (m, **4H**), 1.36 (m, **8H**), 0.92 (t,  $J$  = 6.82 Hz, **6H**).

$^{13}\text{C}$ -NMR ( $\text{CDCl}_3$ , 75 MHz, 25° C):  $\delta$  = 159.11, 149.00, 145.81, 145.56, 145.47, 145.06, 144.61, 144.59, 144.24, 143.30, 142.72, 142.51, 141.19, 138.59, 132.22, 131.72, 115.02, 68.45, 57.77, 32.00, 29.68, 26.18, 23.01, 14.44 ppm.

MS(MALDI-TOF; positive mode detection) : Calculated for  $[\text{M}+\text{H}]^+$ : 1087,26 ; found 1087,24.

MS(MALDI-TOF; negative mode detection) : Calculated for  $[\text{M}]^-$ : 1086,26 ; found 1086,20.

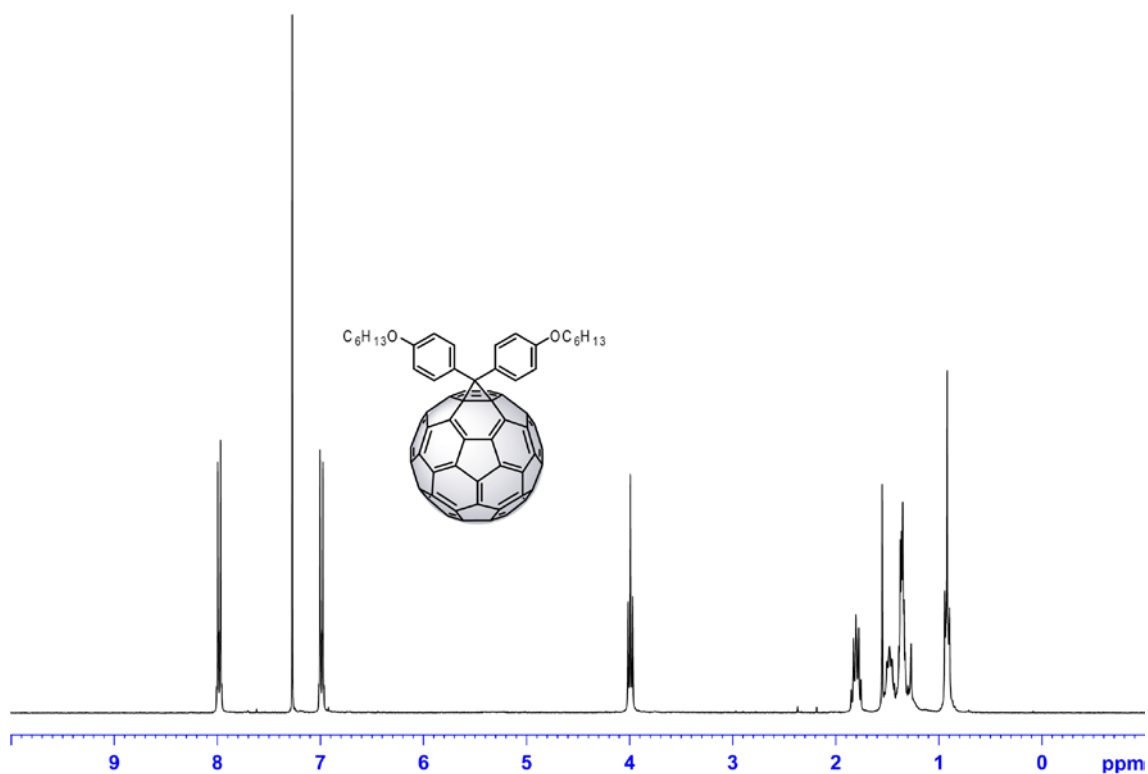

Figure S7.  $^1\text{H}$ -NMR of DPM-6

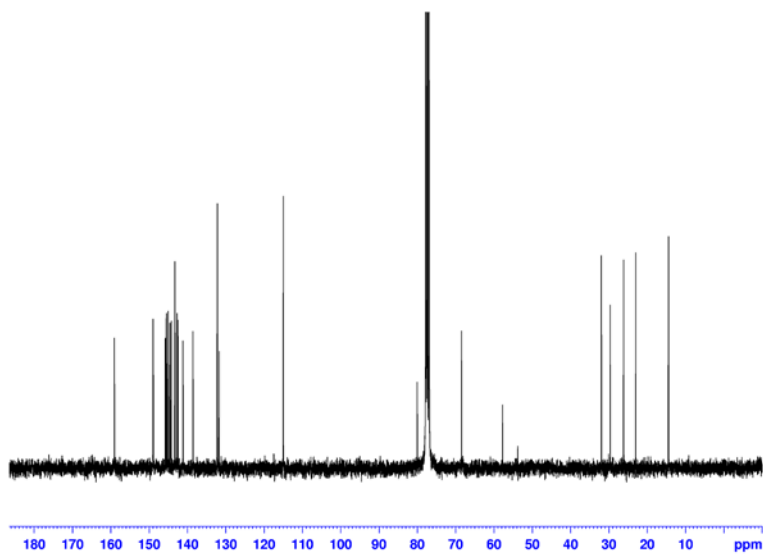

**Figure S8.**  $^{13}\text{C}$ -NMR of DPM-6

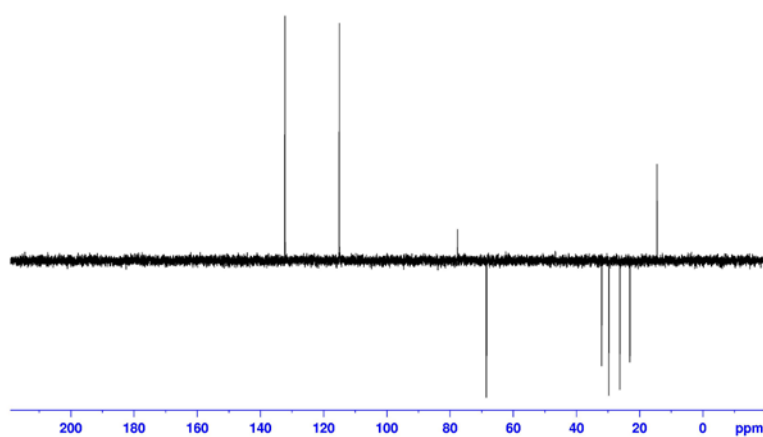

**Figure S9.** DEPT of DPM-6.

D:\Data\UEM\2009-02\01-01\AL014-1\NEG10\_E3\1

Comment 1

Comment 2 HCCA

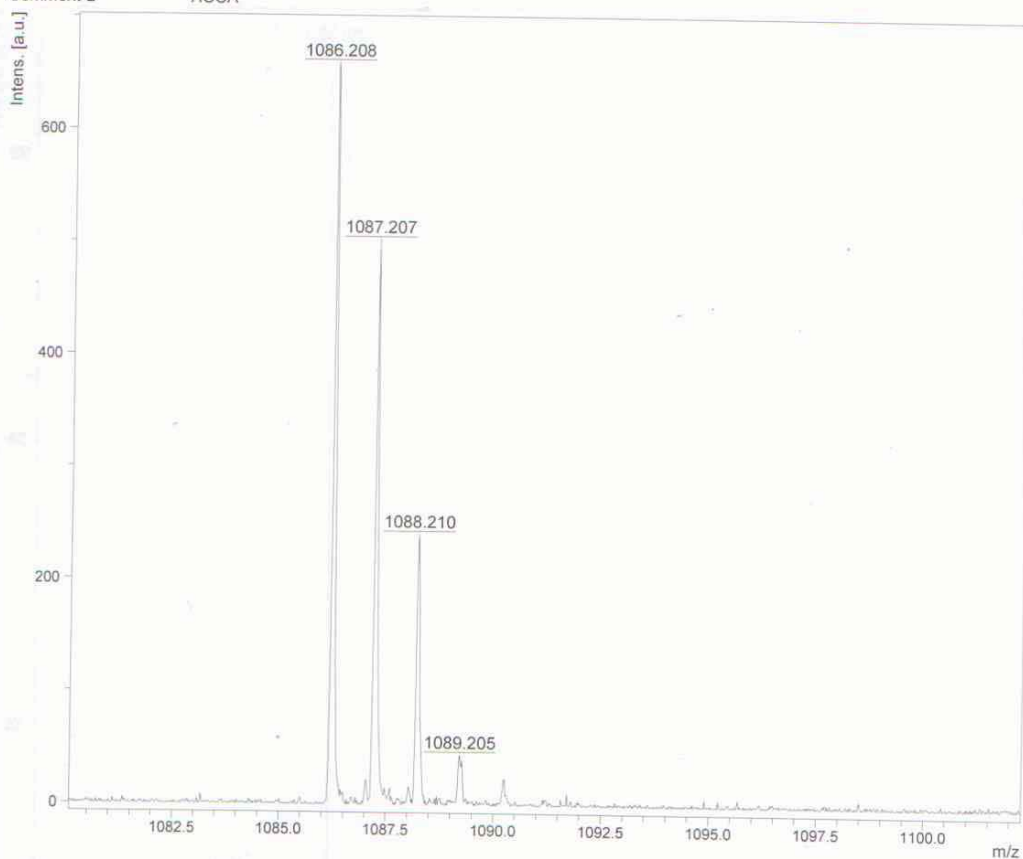

**Acquisition Parameter**

|                                       |                                              |
|---------------------------------------|----------------------------------------------|
| Date of acquisition                   | 2009-02-03 14:43:34                          |
| Acquisition method name               | D:\Methods\flexControlMethods\IRN_PepMix.par |
| Acquisition operation mode            | Reflector                                    |
| Voltage polarity                      | NEG                                          |
| Number of shots                       | 50                                           |
| Name of spectrum used for calibration | cal pept nega\0_E2\1                         |
| Calibration reference list used       | NegPeptideCalibStandard mono                 |

Unidad de Espectrometría de Masas, UCM, Tel: 91 3944160  
<http://www.ucm.es/info/espmasas>

printed: 02/04/2009 12:19:31 PM

**Figure S10:** mass spectrum of DPM-6
